# Supplementary material for: Competitive radiative and reactive relaxation channels in the excited state decay of some thio-analogues of EE-distyrylbenzene
Source: Royal Society of Chemistry journal article supplement (doi:10.1039/b502064f), 2005-06-13
Supplement: b502064f.pdf [file b502064f.pdf]

## Electronic supplementary information (ESI)

Title: Competitive radiative and reactive relaxation channels in the excited state decay of some thio-analogues of *EE*-distyrylbenzene

Authors: G. Ginocchietti, G. Galiazzo, U. Mazzucato and A. Spalletti

### Contents

**Table 1'** NMR data for olefinic, central ring and side ring protons of five thio-analogues of *EE*-distyrylbenzene.

**Table 2'** Computed formation enthalpies and spectral parameters for elongated s-cis,s-cis conformations of five thio-analogues of *EE*-distyrylbenzene.

**Table 3'** Computed formation enthalpies and spectral parameters for conformers of two 3'-thienyl-derivatives of *EE*-distyrylbenzene.

**Table 4'** Spectral properties of five thio-analogues of *EE*-distyrylbenzene.

**Fig. 1'** Mass spectra of five thio-analogues of *EE*-distyrylbenzene.

**Fig. 2'** <sup>1</sup>H-NMR spectrum of *EE*-2,5-di(phenylethenyl)thiophene.

### GC-MS measurements.

These analyses were performed on a Hewlett-Packard model 6890A gas chromatograph (DB 35 MS column, 30m) coupled with a MSD-HP 5973 mass-selective detector (70 eV).

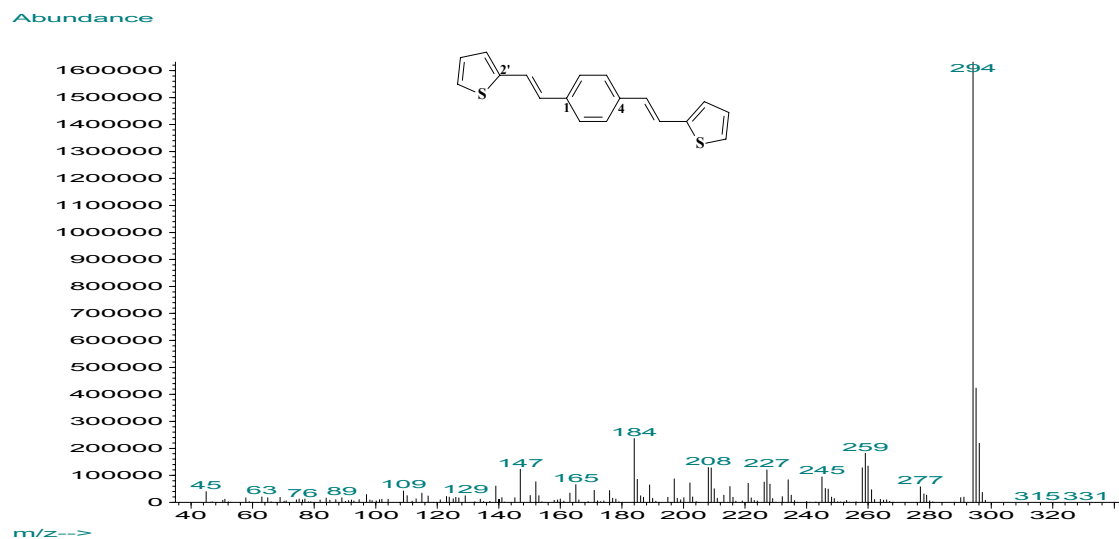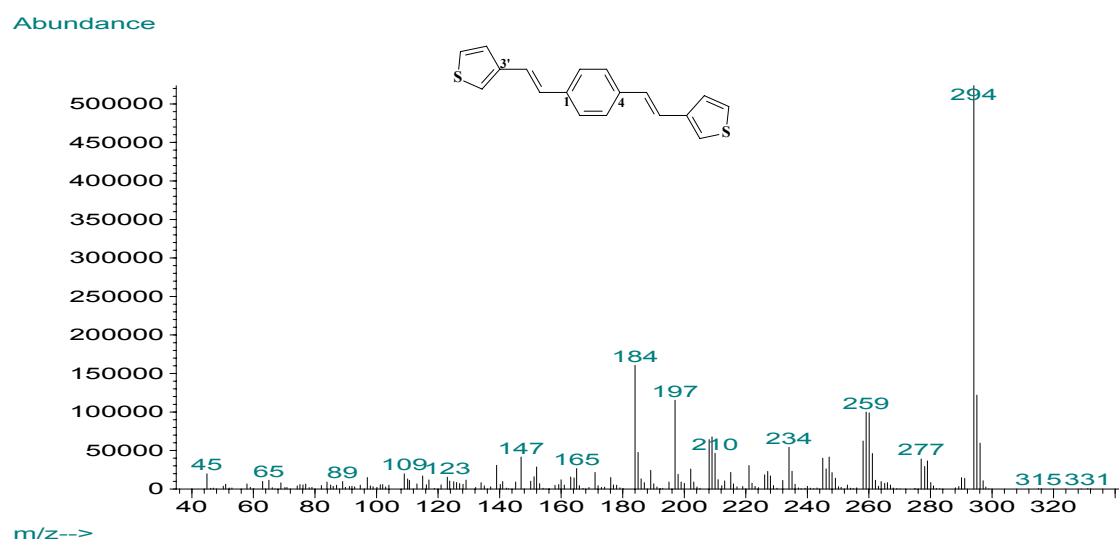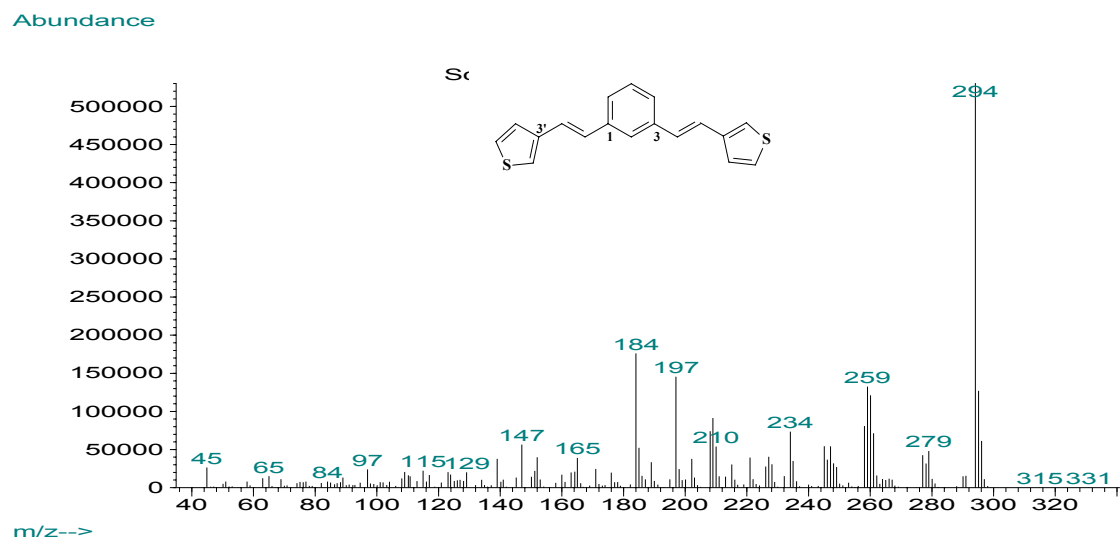

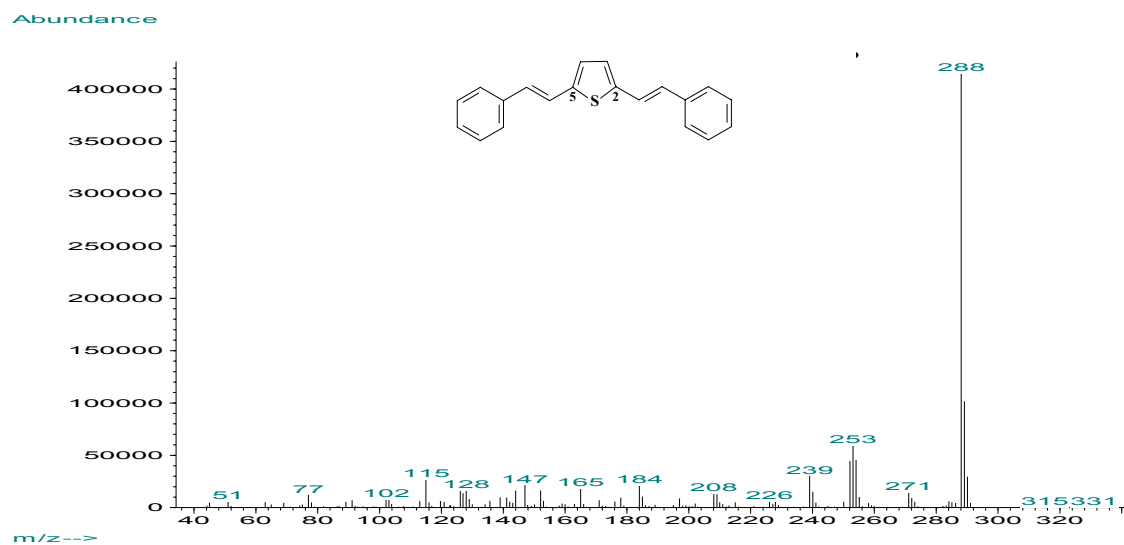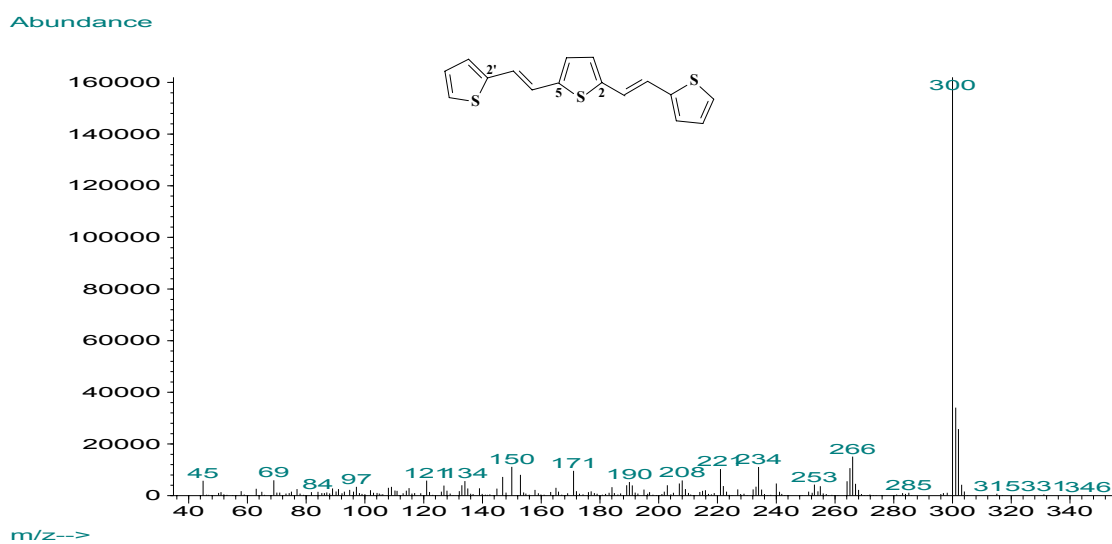

Fig. 1' Mass spectra of the five thio-analogues of distyrylbenzene investigated.

## <sup>1</sup>H NMR data

The one-dimensional <sup>1</sup>H-NMR spectra were measured using a Bruker AC 400 Spectrometer and TMS as reference. The solvents used were deuterated benzene and dimethylsulphoxide (DMSO).

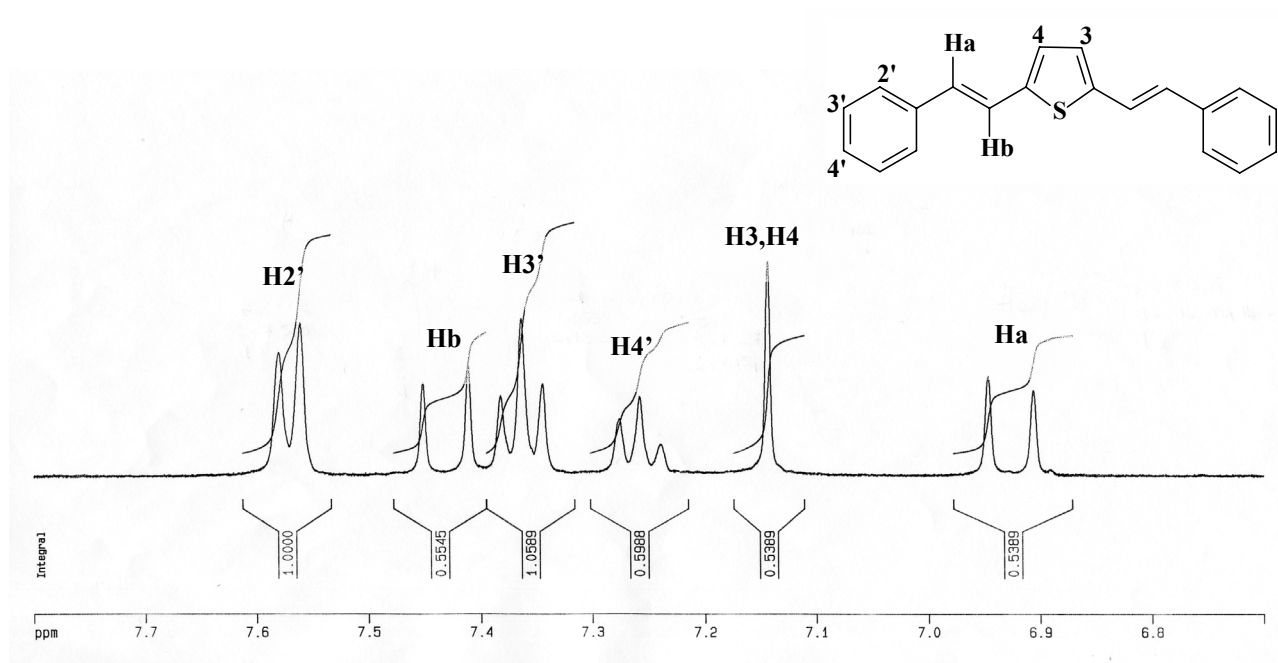

**Fig. 2'** <sup>1</sup>H-NMR spectrum of *EE*-2,5-di(phenylethenyl)thiophene in DMSO as an example.

**Table 1'** Chemical shifts ( $\delta$ ) and coupling constants (J) for olefinic, central ring and side ring protons of the five thio-analogues of *EE*-distyrylbenzene investigated.

| Compound                                                                                                                    | Olefinic protons |                              | Central ring protons |                    | Side ring protons                            |                   |                                                               |                   |
|-----------------------------------------------------------------------------------------------------------------------------|------------------|------------------------------|----------------------|--------------------|----------------------------------------------|-------------------|---------------------------------------------------------------|-------------------|
|                                                                                                                             | $\delta$ (ppm)   | J (Hz)                       | $\delta$ (ppm)       | J (Hz)             | $\delta$ (ppm)                               | J (Hz)            |                                                               |                   |
| 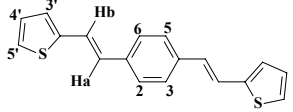 <p><i>EE</i>-1,4-(2TE)<sub>2</sub>B</p>   | Ha<br>Hb         | 6.93 (d, 2H)<br>7.48 (d, 2H) | 16.2<br>16.3         | H2, H3, H5, H6     | 7.35 (s, 4H)                                 | H4'<br>H3'<br>H5' | 7.07 (m, 2H)<br>7.21 (d, 2H)<br>7.56 (d, 2H)                  |                   |
|  <p><i>EE</i>-1,4-(3TE)<sub>2</sub>B</p>   | Ha<br>Hb         | 7.03 (d, 2H)<br>7.24 (d, 2H) | 16.4<br>16.4         | H2, H3, H5, H6     | 7.5 (m, 4H)                                  | H2', H4', H5'     | 7.39-7.42 (m, 6H)                                             |                   |
|  <p><i>EE</i>-1,3-(3TE)<sub>2</sub>B</p>   | Ha<br>Hb         | 7.03 (d, 2H)<br>7.26 (d, 2H) | 16.2<br>16.2         | H2<br>H5<br>H4, H6 | 7.66 (s, 1H)<br>7.28 (t, 1H)<br>7.37 (d, 2H) | 8.5<br>8.5        | H2', H4', H5'                                                 | 7.35-7.42 (m, 6H) |
|  <p><i>EE</i>-2,5-(PhE)<sub>2</sub>T</p>  | Hb<br>Ha         | 6.93 (d, 2H)<br>7.43 (d, 2H) | 16.0<br>16.1         | H3, H4             | 7.14 (s, 2H)                                 | H4'<br>H3'<br>H2' | 7.26 (t, 2H) 7.2<br>7.36 (dd, 4H) 7.5<br>7.57 (d, 4H) 7.7     |                   |
|  <p><i>EE</i>-2,5-(2TE)<sub>2</sub>T</p> | Hb<br>Ha         | 7.06 (d, 2H)<br>7.14 (d, 2H) | 15.8<br>15.8         | H3, H4             | 6.60 (s, 2H)                                 | H4'<br>H3'<br>H5' | 6.75 (dd, 2H) 4.9-3.6<br>6.79 (d, 2H) 2.8<br>6.82 (d, 2H) 4.9 |                   |

### Theoretical Calculations

These were performed using the HyperChem computational package (version 6.1). The calculated electronic spectra (transition energies and oscillator strengths) were obtained by ZINDO/S using optimized geometries (according to PM3 method). Calculations of the configuration interaction included 81 (9x9) single excited configurations. The heats of formation of various conformations of the compounds investigated were also computed.

**Table 2'** Computed formation enthalpies ( $\Delta H_f^\circ$ ) and spectral parameters (transition energy,  $\lambda$ , and oscillator strength, f) for elongated s-cis,s-cis conformations of the EE isomers of the investigated thio-derivatives.

| compound                 | $\Delta H_f^\circ$ (kcal mol <sup>-1</sup> ) | $\lambda$ (nm) | f    |
|--------------------------|----------------------------------------------|----------------|------|
| 1,4-(2TE) <sub>2</sub> B | 115.65                                       | 377            | 2.01 |
|                          |                                              | 307            | 0.00 |
| 1,4-(3TE) <sub>2</sub> B | 112.29                                       | 340            | 1.66 |
|                          |                                              | 301            | 0.01 |
| 1,3-(3TE) <sub>2</sub> B | 112.52                                       | 310            | 0.05 |
|                          |                                              | 303            | 1.45 |
| 2,5-(PhE) <sub>2</sub> T | 108.39                                       | 396            | 1.81 |
|                          |                                              | 299            | 0.01 |
| 2,5-(2TE) <sub>2</sub> T | 126.08                                       | 430            | 1.84 |
|                          |                                              | 323            | 0.01 |

**Table 3'** Computed formation enthalpies and spectral parameters (transition energy,  $\lambda$ , and oscillator strength,  $f$ ) for conformers of the EE isomer of the investigated 3T-derivatives.

| compound                 | rotamer                    | $\Delta H_f^\circ$ (kcal mol <sup>-1</sup> ) | $\lambda$ (nm) | $f$  |
|--------------------------|----------------------------|----------------------------------------------|----------------|------|
| 1,4-(3TE) <sub>2</sub> B | elongated s-cis,s-cis      | 112.29                                       | 340            | 1.66 |
|                          |                            |                                              | 301            | 0.01 |
|                          | elongated s-cis, s-trans   | 112.59                                       | 338            | 1.72 |
|                          |                            |                                              | 301            | 0.02 |
|                          | elongated s-trans, s-trans | 112.90                                       | 335            | 1.89 |
|                          |                            |                                              | 301            | 0.03 |
| 1,3-(3TE) <sub>2</sub> B | compressed s-cis,s-cis     | 112.55                                       | 314            | 0.22 |
|                          |                            |                                              | 306            | 1.11 |
|                          | elongated s-cis, s-cis     | 112.52                                       | 310            | 0.05 |
|                          |                            |                                              | 303            | 1.45 |
|                          | elongated s-trans, s-trans | 113.13                                       | 310            | 0.02 |
|                          |                            |                                              | 293            | 2.52 |

## Spectral data

The absorption and emission spectra were recorded by a Perkin Elmer Lambda 800 spectrophotometer and a Spex Fluorolog –2 F112AI spectrofluorimeter, respectively.

**Table 4'** Spectral properties (main maximum in italics, sh = shoulder) of the EE isomer of the investigated compounds in toluene at room temperature.

| Compound                              | $\lambda_{\text{abs}}^{\text{max}}$<br>(nm) | $\epsilon_{\text{abs}}^{\text{max}}$<br>( $10^4 \text{ M}^{-1} \text{ cm}^{-1}$ ) | $\lambda_{\text{F}}^{\text{max}}$<br>(nm)  |
|---------------------------------------|---------------------------------------------|-----------------------------------------------------------------------------------|--------------------------------------------|
| 1,4-(2TE) <sub>2</sub> B              | 362 <sup>sh</sup> , 379, 396 <sup>sh</sup>  | 5.3                                                                               | 417 <sup>sh</sup> , 441, 467 <sup>sh</sup> |
| 1,4-(3TE) <sub>2</sub> B              | 340 <sup>sh</sup> , 352, 370 <sup>sh</sup>  | 5.7                                                                               | 386 <sup>sh</sup> , 407, 427 <sup>sh</sup> |
| 2,5-(PhE) <sub>2</sub> T              | 374 <sup>sh</sup> , 392, 415 <sup>sh</sup>  | 4.1                                                                               | 435 <sup>sh</sup> , 461, 489 <sup>sh</sup> |
| 1,3-(3TE) <sub>2</sub> B <sup>a</sup> | <i>301</i> , 314 <sup>sh</sup>              | 4.7                                                                               | <i>373</i>                                 |
| 2,5-(2TE) <sub>2</sub> T              | 393 <sup>sh</sup> , 413, 436 <sup>sh</sup>  | 4.9                                                                               | 462 <sup>sh</sup> , 491, 520 <sup>sh</sup> |

<sup>a</sup> In MCH/3MP.
